# Supplementary material
Source: publisher figshare collection journal article supplement (https://tandf.figshare.com/ndownloader/files/38310752)
Supplement: Supplementary file 1 [file 38310752]

## Sheet: Sheet1
Supp. Table 1 Jurassic Thickness in the Qadaim Basin
Well	Whole Jurassic	Upper Jurassic	Middle Jurassic	Lower Jurassic
	(m)	(m)	(m)	(m)
Niu3	867	Undivided	Undivided	Undivided
Niu5	924	Undivided	Undivided	Undivided
Niu7	702	Undivided	Undivided	Undivided
Lengdong2	337	Missing	337	Missing
Lengdong6	330	Undivided	Undivided	Undivided
Long1	1202	620	582	Missing
Long2	1083	474	609	Missing
Long3	1137	499	638	Missing
Long5	2108	1220	888	Missing
Long6	1022	516	506	Missing
Yuanqiu1	558	396	Missing	162
Chaiye1	1019	740	279	Missing
Hongshan1	734	Missing	734	Missing
Da1	798	666	132	Missing
Lengsanshishen7	364	Missing	364	Missing
Shishen18	327	Missing	327	Missing
Gazhong15	261.5	210	51.5	Missing
Gazhong20	570	134	436	Missing
Hongshancan1	1017	Undivided	Undivided	Undivided
Kuzhong1	106	106	Missing	Missing
Macan1	402	402	Missing	Missing
Saiqiancan2	314	Undivided	Undivided	Undivided
Saiqianshen10	353.7	Undivided	Undivided	Undivided
Sucan1	774	287	487	Missing
Xian3	103.5	Missing	103.5	Missing
Xian11	38	Missing	38	Missing
Xian12	125	Missing	125	Missing
Xian13	54	Missing	54	Missing
Average	629.668	482.308	371.722	162
The locations of these wells are shown in Fig. 2
